# Supplementary material for: Analysis of the Possibility of Transport Mode Switch: A Case Study for Joinville Students
Source: Preprints.org preprint supplement (doi:10.20944/preprints202005.0139.v1), 2020-05-08
Supplement: Supplementary file 1 [file supplementary:EthicalApprovalSchubertT.pdf]

## PARECER CONSUBSTANCIADO DO CEP

### DADOS DO PROJETO DE PESQUISA

**Título da Pesquisa:** MUDANÇAS VOLUNTÁRIAS NA ESCOLHA DO MODO DE TRANSPORTE: ESTUDO DE CASO DOS DESLOCAMENTOS DE ESTUDANTES UNIVERSITÁRIOS

**Pesquisador:** THAMIRES FERREIRA SCHUBERT

**Área Temática:**

**Versão:** 3

**CAAE:** 96026418.8.0000.0118

**Instituição Proponente:** FUNDACAO UNIVERSIDADE DO ESTADO DE SC UDESC

**Patrocinador Principal:** Financiamento Próprio

### DADOS DO PARECER

**Número do Parecer:** 2.995.329

#### **Apresentação do Projeto:**

Trata-se de 3ª versão projeto de pesquisa intitulado MUDANÇAS VOLUNTÁRIAS NA ESCOLHA DO MODO DE TRANSPORTE: ESTUDO DE CASO DOS DESLOCAMENTOS DE ESTUDANTES UNIVERSITÁRIOS, que tem como pesquisadora responsável THAMIRES FERREIRA SCHUBERT, do Programa de Pós-graduação em Engenharia Civil - CCT/UDESC.

Este trabalho tem como proposta principal compreender quais fatores influenciam para a escolha do modo de transporte para os estudantes de ensino superior e identificar quais características fariam esse usuário mudar seu comportamento de escolha. Para tanto, foi elaborado um questionário para caracterização do público-alvo, pesquisa de preferência revelada para levantamento da situação atual dos deslocamentos e pesquisa de preferência declarada para os cenários hipotéticos.

Os dados serão utilizados no modelo logit multinomial para avaliar quais fatores tem maior peso para fazer o usuário alterar a escolha de modo de transporte.

Com esses fatores definidos, espera-se sugerir alternativas para melhorar o sistema de transporte incentivando outros modos além do individual motorizado.

Segundo a autora, "estima-se que o questionário será aplicado nas treze faculdades e universidades de Joinville para abranger o maior número de características dos estudantes e das instituições de ensino.

Dessa forma, a pesquisa retornará resultados mais completos e o modelo será mais confiável a

**Endereço:** Av. Madre Benvenutta, 2007

**Bairro:** Itacorubi

**CEP:** 88.035-001

**UF:** SC

**Município:** FLORIANOPOLIS

**Telefone:** (48)3664-8084

**Fax:** (48)3664-8084

**E-mail:** cepsh.udesc@gmail.com

Continuação do Parecer: 2.995.329

presente realidade".

A pesquisa abordará 400 alunos nas IES de Joinville, em número de 13 IES.

#### Cronograma de Execução

Defesa da dissertação de 01/03/2019 a 15/03/2019

Análise e tabulação dos dados de 01/10/2018 a 30/11/2018

Discussão dos resultados de 01/12/2018 a 31/01/2019

Redação da dissertação de 01/01/2019 a 28/02/2019

Coleta de dados de 20/08/2018 a 20/10/2018.

Como orçamento Orçamento Financeiro, constando Deslocamento Custeio R\$ 400,00 e

Impressão Custeio R\$ 300,00 = Total em R\$ R\$ 700,00.

#### Objetivo da Pesquisa:

O Objetivo geral da pesquisa é compreender quais fatores influenciam para a escolha do modo de transporte para os estudantes de ensino superior e identificar quais características fariam esse usuário mudar seu comportamento de escolha.

#### Objetivos Específicos:

Especificamente, os objetivos são:

- Realizar uma revisão sistemática da literatura;
- Elaborar e validar um instrumento de coleta de dados;
- Propor um modelo para a escolha do modo de transporte entre os estudantes;
- Verificar quais fatores tem peso maior para fazer o usuário mudar a escolha de modo de transporte, utilizando outros modos que não sejam o veículo individual;
- Sugerir alternativas de melhorias para o sistema de transporte considerando o deslocamento dos estudantes.

#### Avaliação dos Riscos e Benefícios:

Riscos:

O risco da aplicação do questionário é mínimo, sendo considerado algum constrangimento vergonha e intimidação na coleta de informações do respondente. No termo de consentimento livre e esclarecido(TCLE), o participante fica ciente de que pode deixar a pesquisa a qualquer momento e que o abandono não acarretará nenhuma consequência a ele.

A relatoria entende que os riscos podem ser mínimos, pois serão respondidos formulários via

**Endereço:** Av.Madre Benvenutta, 2007

**Bairro:** Itacorubi

**CEP:** 88.035-001

**UF:** SC

**Município:** FLORIANOPOLIS

**Telefone:** (48)3664-8084

**Fax:** (48)3664-8084

**E-mail:** cepsh.udesc@gmail.com

Continuação do Parecer: 2.995.329

email, internet, mas a desistência se constitui um direito do participante.

#### Benefícios:

Espera-se que as respostas coletadas pelos respondentes sirvam como banco de dados para propor um modelo de escolha discreta, compreendendo como os estudantes se deslocam até as instituições de ensino. Para os participantes, os benefícios e vantagens em participar deste estudo se traduzem na compreensão do motivo de escolha do modo de transporte pelo estudante, no seu deslocamento até a faculdade. Os dados e informações resultantes desta pesquisa contribuirão na indicação das características de cada transporte, as quais motivam o usuário a escolher determinada forma de locomoção, em detrimento das outras, possibilitando a melhoraria das políticas públicas de gestão da mobilidade urbana ao incentivar os modos de transporte ativos (como a bicicleta e o caminhar) e coletivo (ônibus, por exemplo) para tornar a atividade de deslocamento mais agradável e eficiente.

A relatoria entende que estes benefícios são da pesquisa como um todo e serão diretos e indiretos e tardios.

#### Comentários e Considerações sobre a Pesquisa:

Pesquisa relevante, com mérito científico, em relação ao desenvolvimento urbano e uso de transporte pelos estudantes na cidade de Joinville.

O protocolo está de acordo com as normativas vigentes.

#### Considerações sobre os Termos de apresentação obrigatória:

Apresenta:

- Como Projeto detalhado, o projeto de qualificação;
- Projeto Básico, com todas as necessárias informações;
- Folha de rosto com as devidas assinaturas da pesquisadora e do Diretor Geral do CCT/UDESC com um público de 400 participantes;
- TCLE utilizado o modelo de formulário que está na página do CEP SH/UDESC, com cabeçalho, logomarca adequando a redação com sua pesquisa;
- Declaração das Instituições Envolvidas.

#### Recomendações:

N/A

**Endereço:** Av. Madre Benvenutta, 2007

**Bairro:** Itacorubi

**CEP:** 88.035-001

**UF:** SC

**Município:** FLORIANOPOLIS

**Telefone:** (48)3664-8084

**Fax:** (48)3664-8084

**E-mail:** cepsh.udesc@gmail.com

Continuação do Parecer: 2.995.329

**Conclusões ou Pendências e Lista de Inadequações:**

Foi esclarecido e justificado que as coletas de dados serão feitas em apenas 5 Instituições de Ensino Superior.

Em não havendo mais pendências o protocolo está apto para Aprovação.

**Considerações Finais a critério do CEP:**

O Colegiado APROVA o Projeto de Pesquisa e informa que, qualquer alteração necessária ao planejamento e desenvolvimento do Protocolo Aprovado ou cronograma final, seja comunicada ao CEP SH via Plataforma Brasil na forma de EMENDA, para análise sendo que para a execução deverá ser aguardada aprovação final do CEP SH. A ocorrência de situações adversas durante a execução da pesquisa deverá ser comunicada imediatamente ao CEP SH via Plataforma Brasil, na forma de NOTIFICAÇÃO. Em não havendo alterações ao Protocolo Aprovado e/ou situações adversas durante a execução, deverá ser encaminhado RELATÓRIO FINAL ao CEP SH via Plataforma Brasil até 60 dias da data final definida no cronograma, para análise e aprovação.

Lembramos ainda, que o participante da pesquisa ou seu representante legal, quando for o caso, bem como o pesquisador responsável, deverão rubricar todas as folhas do Termo de Consentimento Livre e Esclarecido - TCLE - apondo suas assinaturas na última página do referido Termo.

**Este parecer foi elaborado baseado nos documentos abaixo relacionados:**

| Tipo Documento                                            | Arquivo                                       | Postagem               | Autor                            | Situação |
|-----------------------------------------------------------|-----------------------------------------------|------------------------|----------------------------------|----------|
| Informações Básicas do Projeto                            | PB_INFORMAÇÕES_BÁSICAS_DO_PROJETO_1071931.pdf | 31/10/2018<br>11:38:29 |                                  | Aceito   |
| Projeto Detalhado / Brochura Investigador                 | Projeto.pdf                                   | 10/10/2018<br>22:32:30 | THAMIRES<br>FERREIRA<br>SCHUBERT | Aceito   |
| TCLE / Termos de Assentimento / Justificativa de Ausência | TCLE.pdf                                      | 10/10/2018<br>22:29:20 | THAMIRES<br>FERREIRA<br>SCHUBERT | Aceito   |
| Declaração de Instituição e Infraestrutura                | Declaracoes_FCJ_INESA_UDESC_UFSC_UNIVILLE.pdf | 10/10/2018<br>22:28:31 | THAMIRES<br>FERREIRA<br>SCHUBERT | Aceito   |
| Outros                                                    | Questionario.pdf                              | 10/10/2018<br>22:26:50 | THAMIRES<br>FERREIRA             | Aceito   |

**Endereço:** Av. Madre Benvenutta, 2007**Bairro:** Itacorubi**CEP:** 88.035-001**UF:** SC**Município:** FLORIANOPOLIS**Telefone:** (48)3664-8084**Fax:** (48)3664-8084**E-mail:** cepsh.udesc@gmail.com

Continuação do Parecer: 2.995.329

|                                     |                            |                        |                                  |        |
|-------------------------------------|----------------------------|------------------------|----------------------------------|--------|
| Outros                              | Questionario.pdf           | 10/10/2018<br>22:26:50 | SCHUBERT                         | Aceito |
| Recurso Anexado<br>pelo Pesquisador | Resposta_Parecer_CEPSh.pdf | 10/10/2018<br>22:26:13 | THAMIRES<br>FERREIRA<br>SCHUBERT | Aceito |
| Folha de Rosto                      | FolhadeRostov2.pdf         | 26/07/2018<br>20:22:30 | THAMIRES<br>FERREIRA<br>SCHUBERT | Aceito |

**Situação do Parecer:**

Aprovado

**Necessita Apreciação da CONEP:**

Não

FLORIANOPOLIS, 01 de Novembro de 2018

---

**Assinado por:**  
**Renan Thiago Campestrini**  
**(Coordenador(a))**

**Endereço:** Av.Madre Benvenutta, 2007**Bairro:** Itacorubi**CEP:** 88.035-001**UF:** SC**Município:** FLORIANOPOLIS**Telefone:** (48)3664-8084**Fax:** (48)3664-8084**E-mail:** cepsh.udesc@gmail.com
